# Supplementary material
Source: PubMed Central journal article supplement (PMC4396605)
Supplement: supp_fj.14-263061_Supplemental_Figure1.pdf [file supp_fj.14-263061_Supplemental_Figure1.pdf]

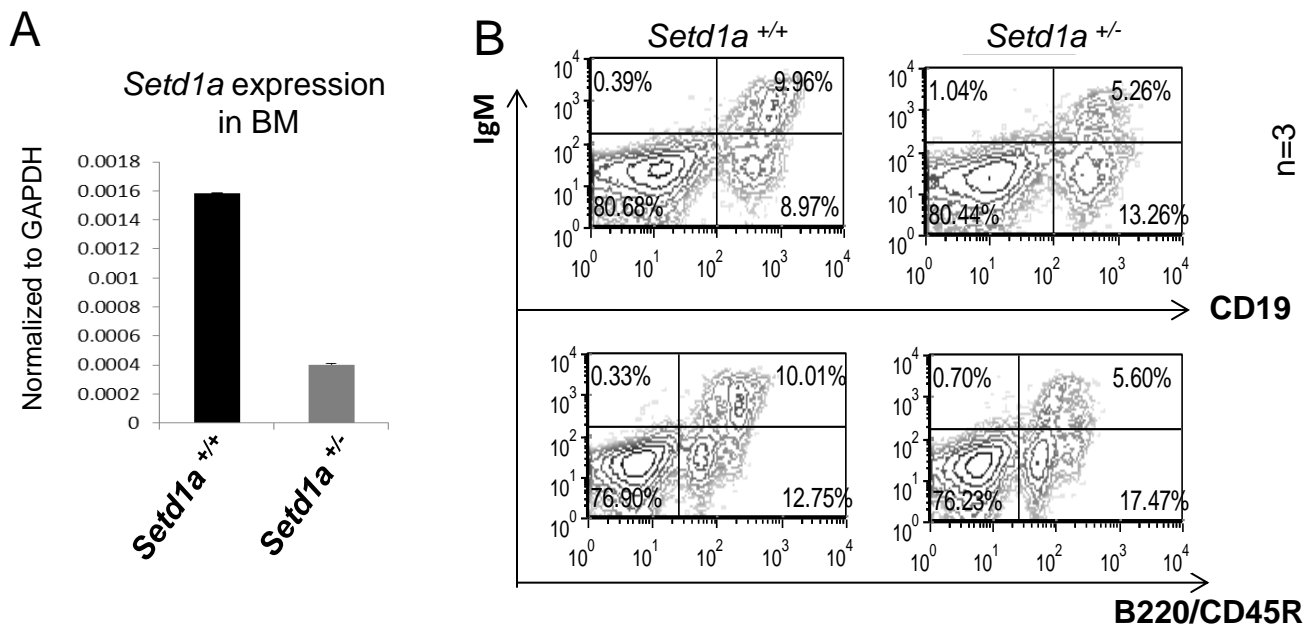

**C** Summary of FACS analysis comparing WT and *Setd1a*<sup>+/-</sup> mice

|   | IgM+/ CD19+ population (%)   |                              | IgM+/ B220+ population (%)   |                              |
|---|------------------------------|------------------------------|------------------------------|------------------------------|
|   | <i>Setd1a</i> <sup>+/+</sup> | <i>Setd1a</i> <sup>+/-</sup> | <i>Setd1a</i> <sup>+/+</sup> | <i>Setd1a</i> <sup>+/-</sup> |
| 1 | 9.96                         | 5.26                         | 10.01                        | 5.60                         |
| 2 | 6.17                         | 4.24                         | 6.19                         | 4.18                         |
| 3 | 5.63                         | 2.8                          | 5.71                         | 2.9                          |

**Figure S1. Reduced *Setd1A* levels resulted in a decrease in mature B-cell population. (A)** qRT-PCR analysis of *Setd1a* expression in *Setd1a*<sup>+/-</sup> and *Setd1a*<sup>+/+</sup> mice. **(B)** FACS analysis demonstrated a significant reduction in the level of IgM<sup>+</sup>/CD19<sup>+</sup> and IgM<sup>+</sup>/B220<sup>+</sup> population in the bone marrow hematopoietic cells comparing *Setd1a*<sup>+/-</sup> heterozygous mice with wild type *Setd1a*<sup>+/+</sup> mice. **(C)** Summary of FACS analysis comparing *Setd1a*<sup>+/-</sup> heterozygous mice (n=3) with wild type *Setd1a*<sup>+/+</sup> mice (n=3).

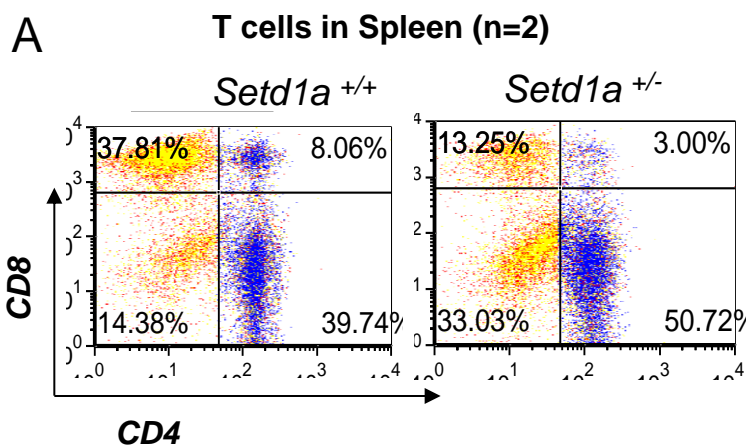

**B**

|   | CD4+/ CD8+ population (%)    |                              |
|---|------------------------------|------------------------------|
|   | <i>Setd1a</i> <sup>+/+</sup> | <i>Setd1a</i> <sup>+/-</sup> |
| 1 | 8.06                         | 3.00                         |
| 2 | 7.30                         | 2.16                         |

**Figure S2. Loss of *Setd1a* led to a decrease in T cell population in spleen. (A)** Representative flow cytometry data demonstrated a significant reduction in the level of CD4<sup>+</sup>/CD8<sup>+</sup> population in the spleen of *Setd1a* heterozygous mice compare with wild type mice. (n=2) **(B)** Reduction has been detected in two different mice.

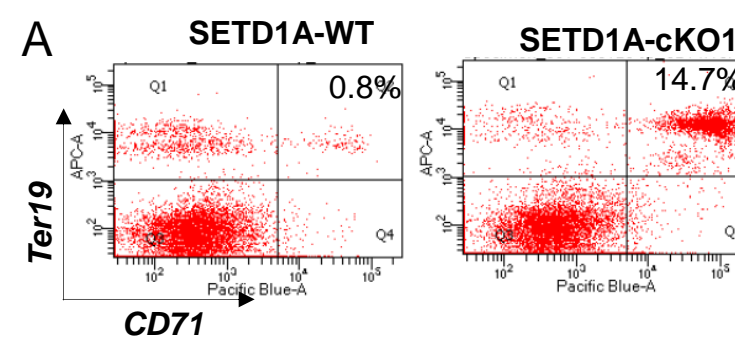

**Figure S3. Reduced *Setd1a* levels resulted in an increase in BM LSK HS/PC fraction and myeloid population in spleen.** (A) FACS analysis of CD71<sup>+</sup>/Ter119<sup>+</sup> erythroid cells in spleen comparing the *Setd1a-cKO* mice with wild type *Setd1a*<sup>+/+</sup> mice. (B) FACS analysis of Gr-1<sup>+</sup>/CD11B<sup>+</sup> myeloid cells in spleen comparing the *Setd1a-cKO* mice with wild type *Setd1a*<sup>+/+</sup> mice (Left). The right panel indicates the percentage of spleen myeloid cell population in the WT and *Setd1a-cKO* mice (Right).

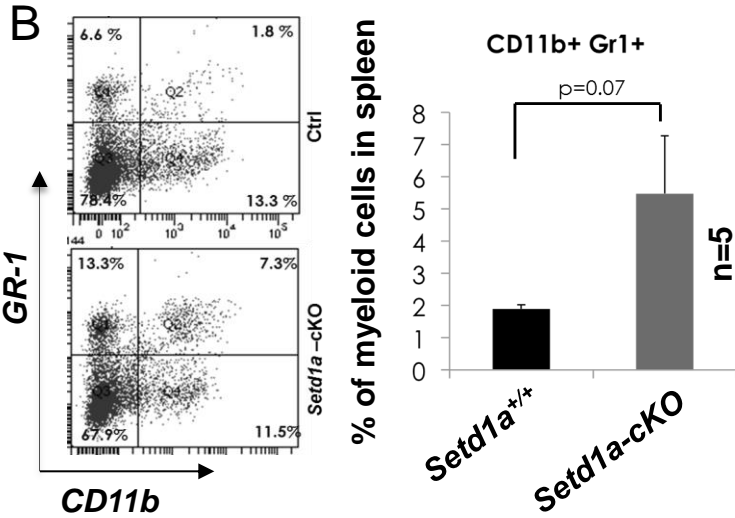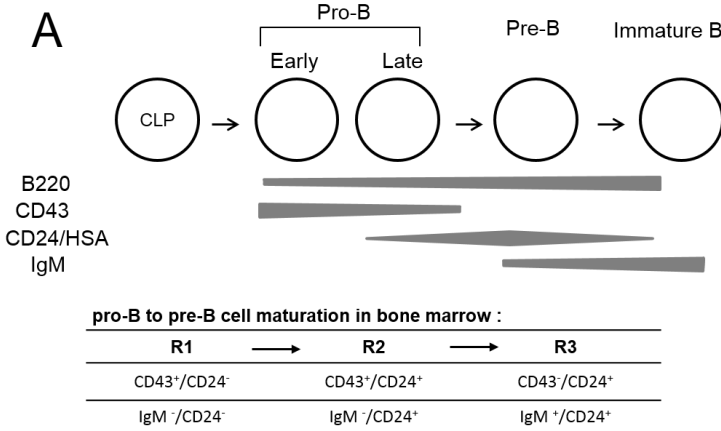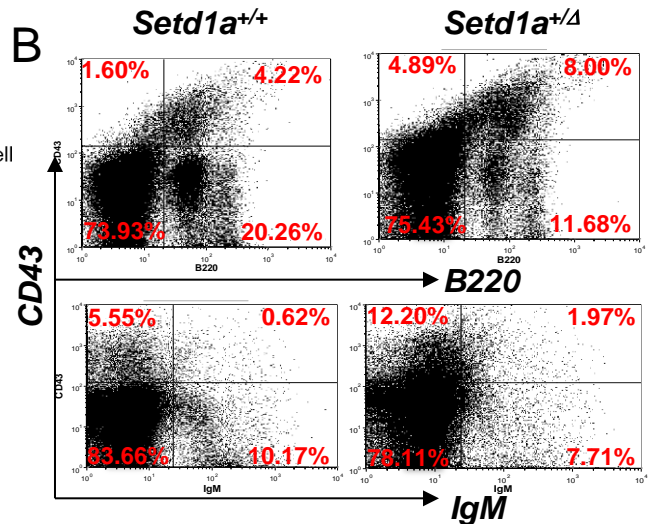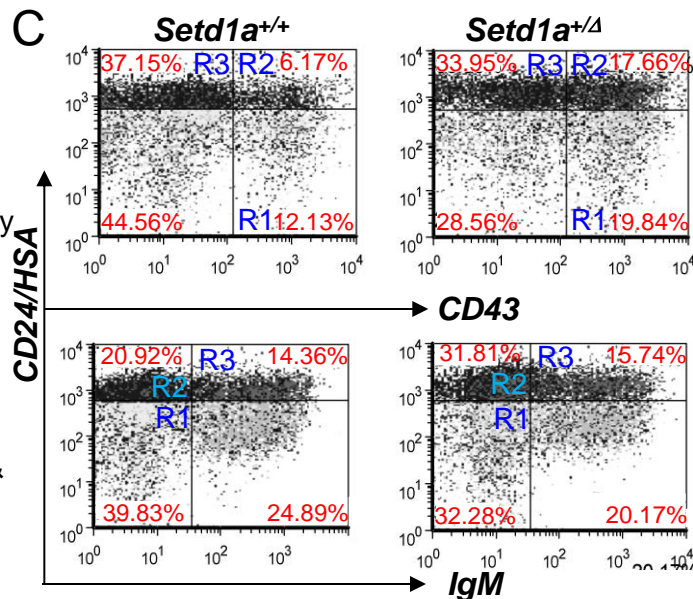

**Figure S4. Reduced *Setd1a* expression led to a block of pro-B to pre-B cell development.** (A) Schematic representation of B-cell development stages and the surface markers expressing in each stage in bone marrow. (B) Representative flow cytometry data demonstrated a block from pro-B (IgM<sup>-</sup> B220<sup>+</sup> CD43<sup>+</sup>) to pre-B cells (IgM<sup>-</sup> B220<sup>+</sup> CD43<sup>-</sup>) in the bone marrow of *Setd1a* heterozygous mice compare with wild type mice (n=3). (C) Representative FACS analysis of pro-B to pre-B cell development from R1 stage (CD43<sup>+</sup>/CD24<sup>-</sup> & IgM<sup>-</sup>/CD24<sup>-</sup>) to R2 stage (CD43<sup>+</sup>/CD24<sup>+</sup> & IgM<sup>-</sup>/CD24<sup>+</sup>) and to R3 stage (CD43<sup>-</sup>/CD24<sup>+</sup> & IgM<sup>+</sup>/CD24<sup>+</sup>) in the bone marrow. The *Setd1a* heterozygous mice (n=3) exhibited a block in these transitional stages from pro-B to pre-B maturation.

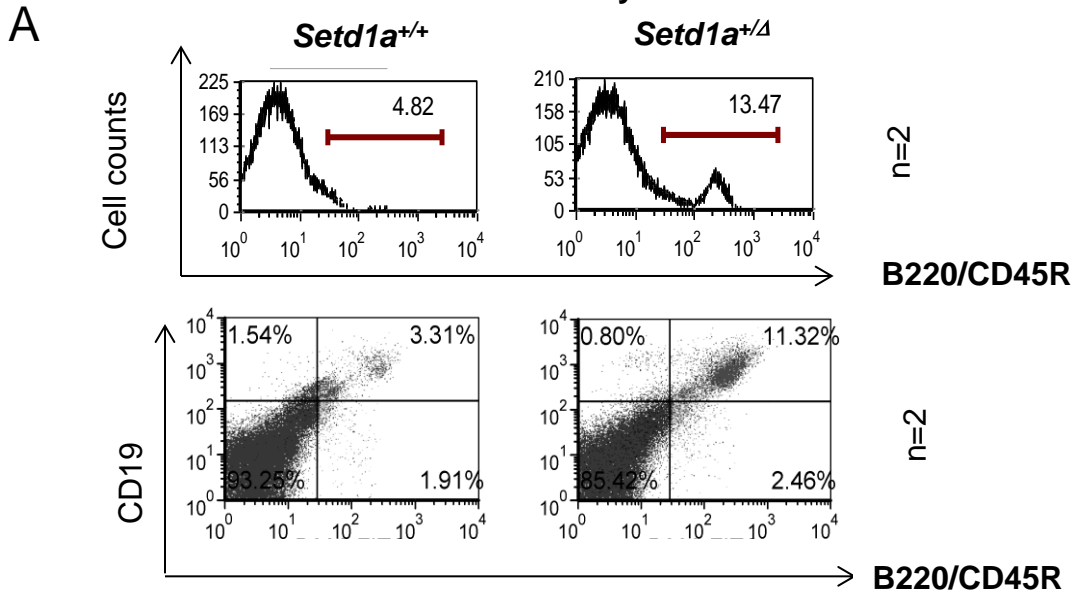

**Figure S5. B cells infiltrate into thymus in the *Setd1a*<sup>+/ $\Delta$</sup>  heterozygous mice.** Representative FACS analysis demonstrated an infiltration of B220<sup>+</sup> B cells in the thymus of *Setd1a*<sup>+/ $\Delta$</sup>  heterozygous mice compare with wild type *Setd1a*<sup>+/+</sup> mice.
